# Supplementary material
Source: PubMed Central journal article supplement (PMC5790179)
Supplement: NIHMS926021-supplement.pdf [file NIHMS926021-supplement.pdf]

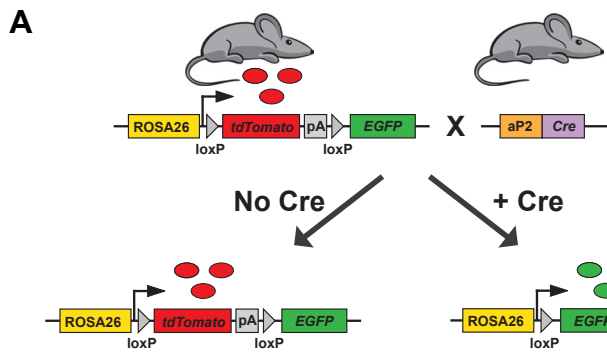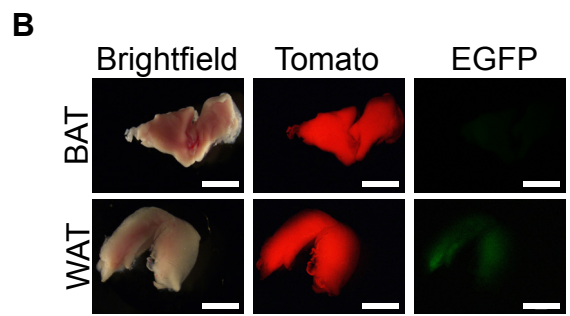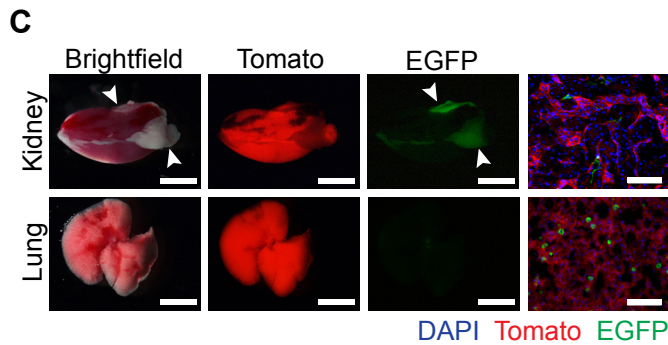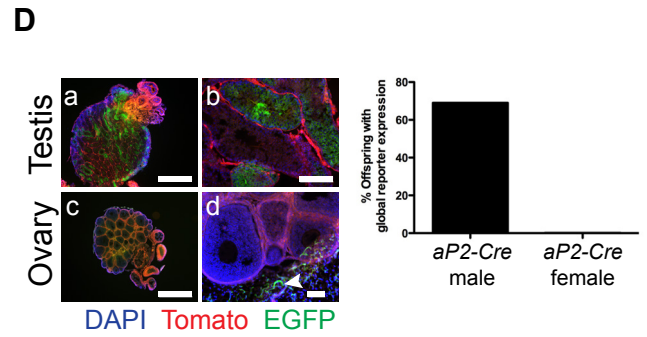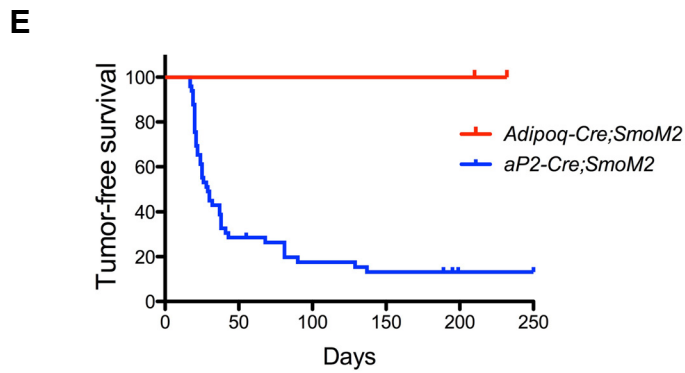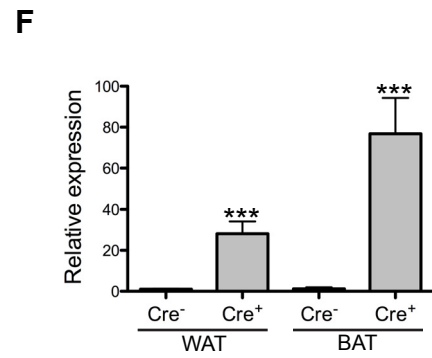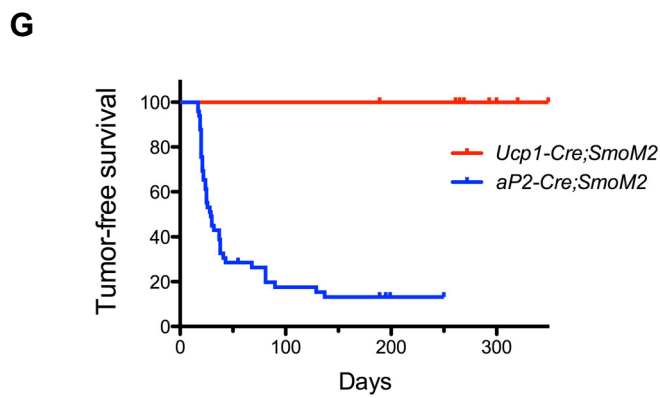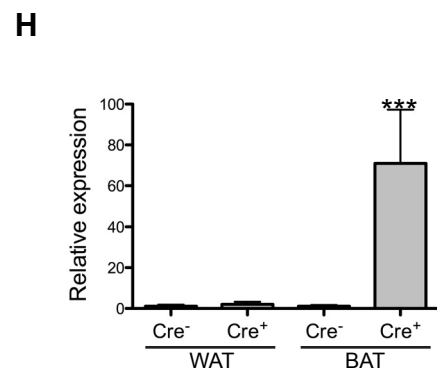

**Figure S1. Related to Figure 1. Localization of aP2-Cre expressing cells in aP2-Cre;R26-mT/mG animals.**

(A) Schematic of the *R26-mT/mG* allele and *aP2-Cre* mediated recombination.

(B) Representative whole mount images of BAT (intrascapular brown adipose) and WAT (inguinal white adipose) from *R26-mT/mG* mice (n = 3). Scale bars, 3mm.

(C) Representative whole mount and fixed tissue sections of lung and kidney from *aP2-Cre;mT/mG* mice (n = 3). Scale bars, 3mm (whole mount), 50  $\mu$ m (tissue sections). Arrowheads denotes perineal adipose.

(D) Representative fixed tissue sections of testis (a and b) and ovaries (c and d) from *aP2-Cre;mT/mG* mice and percent of global Cre recombination observed in *aP2-Cre* mice (male n = 36; female n = 698). Scale bars, 500  $\mu$ m (a and c), 100  $\mu$ m (b and d). Arrowhead denotes adipose adjacent to ovary.

(E) Kaplan-Meier Survival curves showing tumor free survival of *Adipoq-Cre;Smo<sup>M2/+</sup>* mice (n = 6) in comparison to AS mice (n = 49) (Hatley et al., 2012).

(F) Real-time PCR of SmoM2-YFP expression in BAT and WAT from *Adipoq-Cre;Smo<sup>M2/+</sup>* and *Smo<sup>M2/+</sup>* mice. Data shown are normalized to *Actb* expression and expressed relative to Cre negative controls (n = 3, mean  $\pm$  SEM).

(G) Kaplan-Meier Survival curves showing tumor free survival of *Ucp1-Cre;Smo<sup>M2/+</sup>* (n = 23) mice in comparison to AS mice (n = 49) (Hatley et al., 2012).

(H) Real-time PCR of SmoM2-YFP expression in BAT and WAT from *Ucp1-Cre;Smo<sup>M2/+</sup>* and *Smo<sup>M2/+</sup>* mice. Data shown are normalized to *Actb* expression and expressed relative to Cre negative controls (n = 3, mean  $\pm$  SEM).

\*\*\* p < 0.001

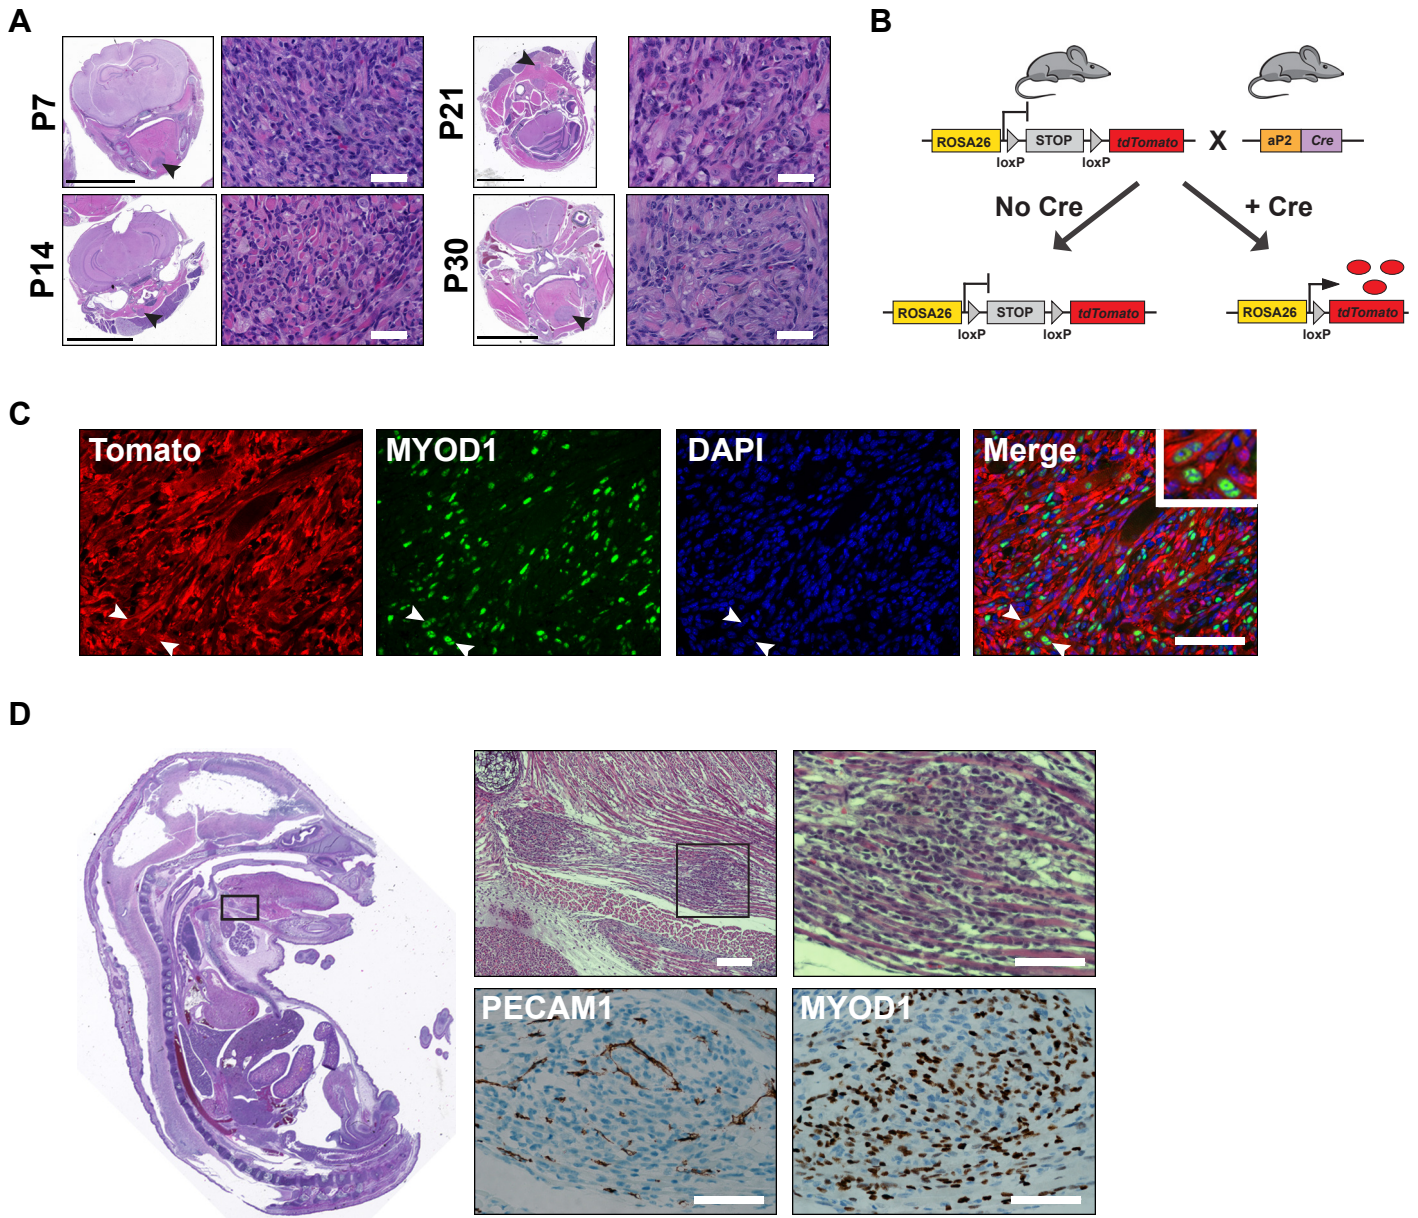

**Figure S2. Related to Figure 2. Characterization of tumors from *aP2-Cre; Smo<sup>M2/+</sup>; R26-tdTom* animals.**

(A) Gross cross sections and histology (H & E) of head and neck tumors from P7, P14, P21 and P30 AST mice. Arrows denote tumor localization. Scale bars, 5 mm (left), 25  $\mu$ m (right).

(B) Schematic of AT breeding.

(C) Representative immunofluorescence of AST tumors showing MYOD1 (green), Tomato (red) and DAPI (blue)(n = 3). Arrows denotes region of high magnification inset shown on upper right. Scale bars, 50  $\mu$ m.

(D) Representative sagittal sections of E16.5 *Fabp4-Cre; Smo<sup>M2/+</sup>* embryos (n = 3). Insets of boxed regions are shown at low magnification (scale bar, 100  $\mu$ m) and high magnification (scale bar, 50  $\mu$ m).

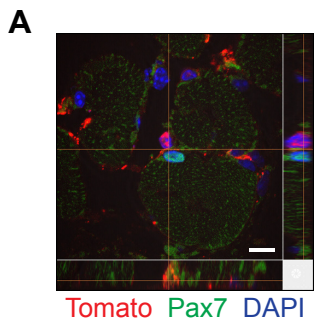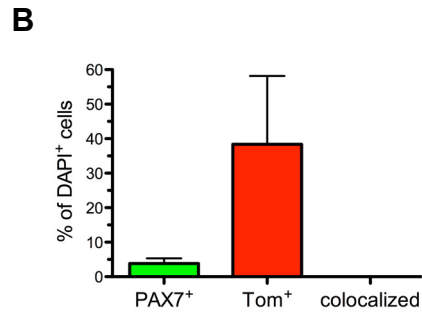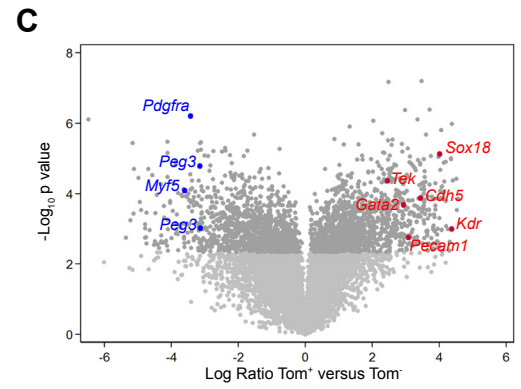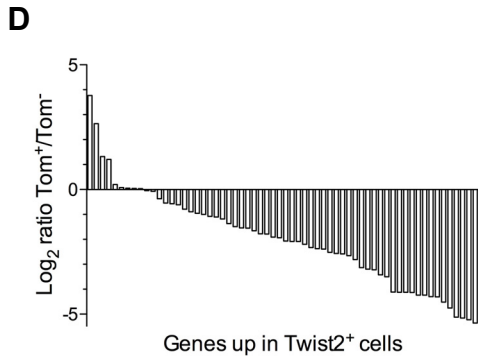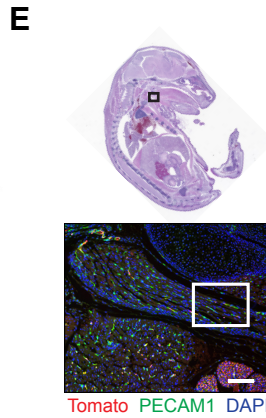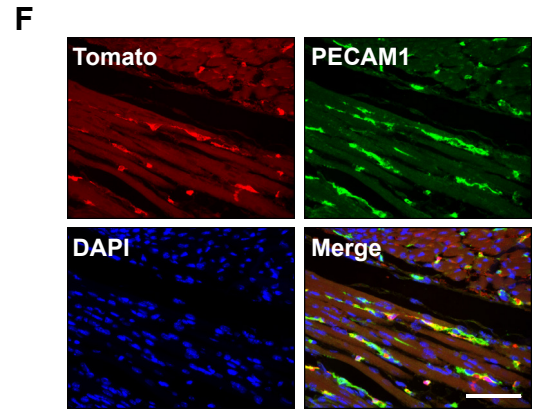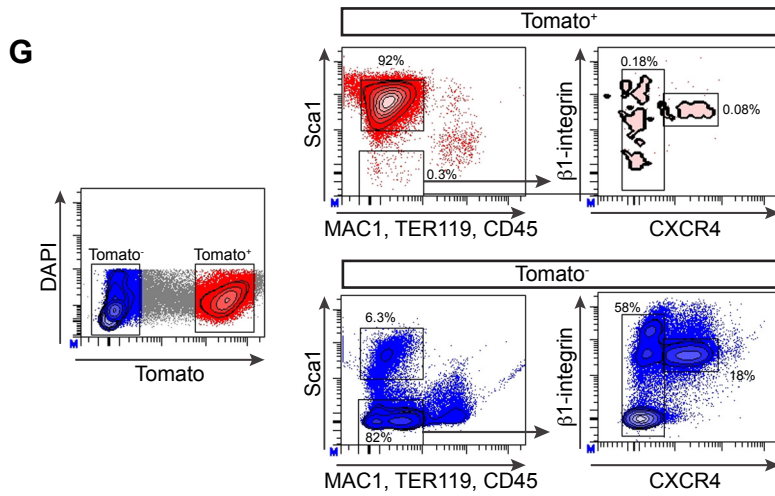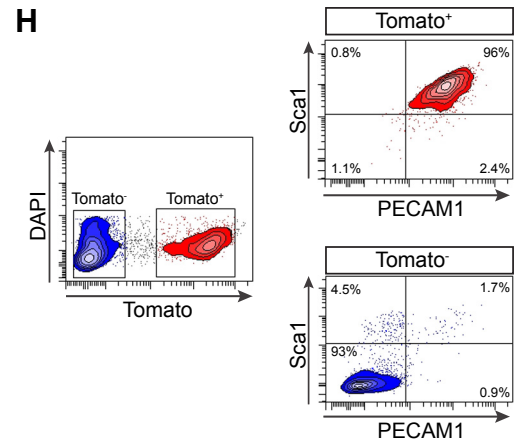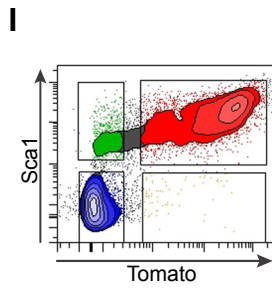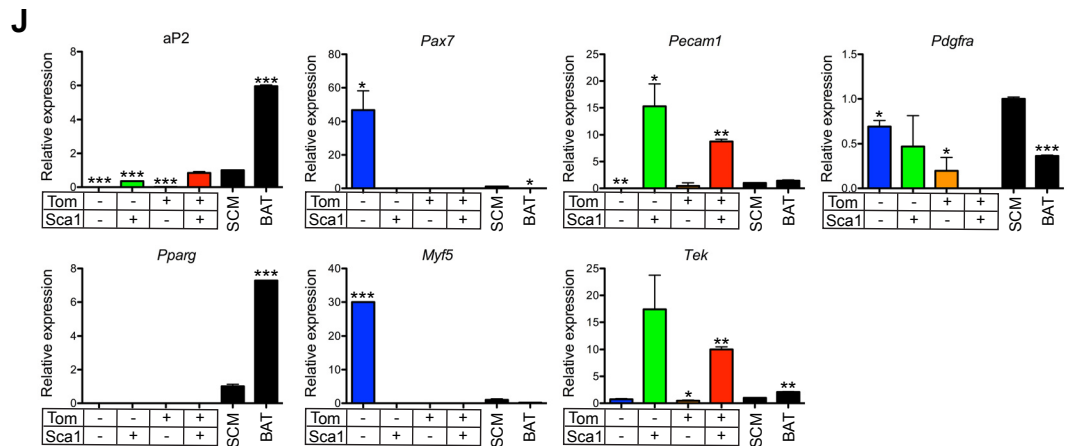

**Figure S3. Related to Figure 3. aP2-Cre labels endothelial cells within the muscle interstitium.**

(A) Confocal microscopy illustrating 3D cross sections from SCM of AT mice. PAX7 (green), TOMATO (red) and DAPI (blue) shown. Scale bar, 10  $\mu$ m.

(B) Quantitation of Tomato and PAX7 co-localization from sections in Figure 3A. 909 cells were counted from 22 fields from SCM sections of 5 AT mice. 34 (3.8%) of the cell nuclei were PAX7<sup>+</sup>. There was no co-localization with any of the 335 tomato positive cells and PAX7. Bars are mean  $\pm$  SEM.

(C) Volcano plot of the Log of the p value versus the log fold change in expression between the tomato positive (Tom<sup>+</sup>) and negative (Tom<sup>-</sup>) cells isolated from AT SCM by FACS. Solid grey dots indicate FDR > 0.05.

(D) Log<sub>2</sub> ratio of expression in Tom<sup>+</sup> versus Tom<sup>-</sup> cells isolated from SCM of AT mice for genes enriched in Twist2 expressing muscle interstitial cells (Liu et al., 2017) illustrating only 4 of 63 genes similarly enriched in Tom<sup>+</sup> cells from AT SCM.

(E) Gross histology and immunofluorescence of E18.5 AT sagittal section showing PECAM1 (green), TOMATO (red) and DAPI (blue). Scale bars, 100  $\mu$ m.

(F) High magnification split channel images of boxed inset from (D). Scale bars, 50  $\mu$ m.

(G-H) Flow cytometric analysis of Tom<sup>+</sup> and Tom<sup>-</sup> cells from AT SCM for MAC1, Ter119, CD45, Sca1,  $\beta$ 1integrin and CXCR4 (G) and Sca1 and PECAM1 (H).

(I) FACS plot showing isolation of Tom<sup>-</sup>;Sca1<sup>-</sup>, Tom<sup>-</sup>;Sca1<sup>+</sup>, Tom<sup>+</sup>;Sca1<sup>-</sup>, and Tom<sup>+</sup>;Sca1<sup>+</sup> cells from AT SCM.

(J) Real-time PCR of isolated populations from (I) compared to mature SCM and BAT from *Smo*<sup>M2/M2</sup> mice. Data shown are normalized to *Actb* expression and expressed relative to mature SCM. Bars are mean  $\pm$  SEM.

\*p < 0.05, \*\* p < 0.01, \*\*\* p < 0.001



**A**

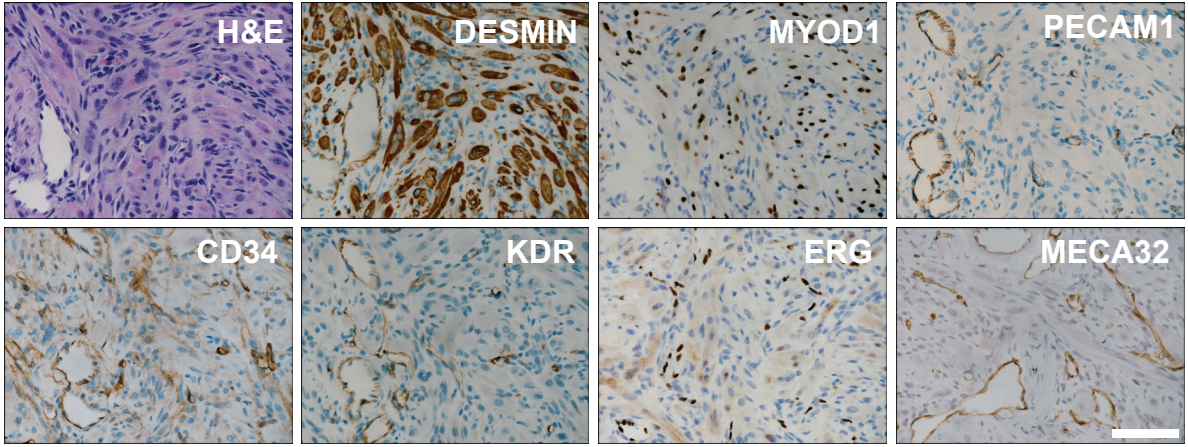

**B**

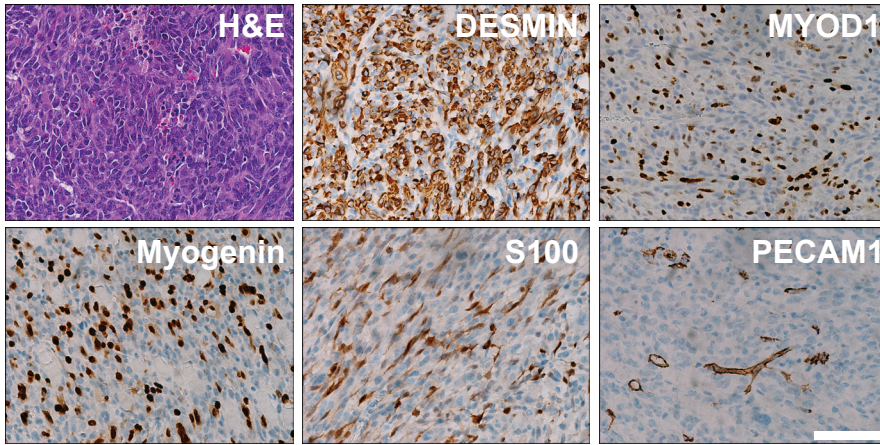

**C**

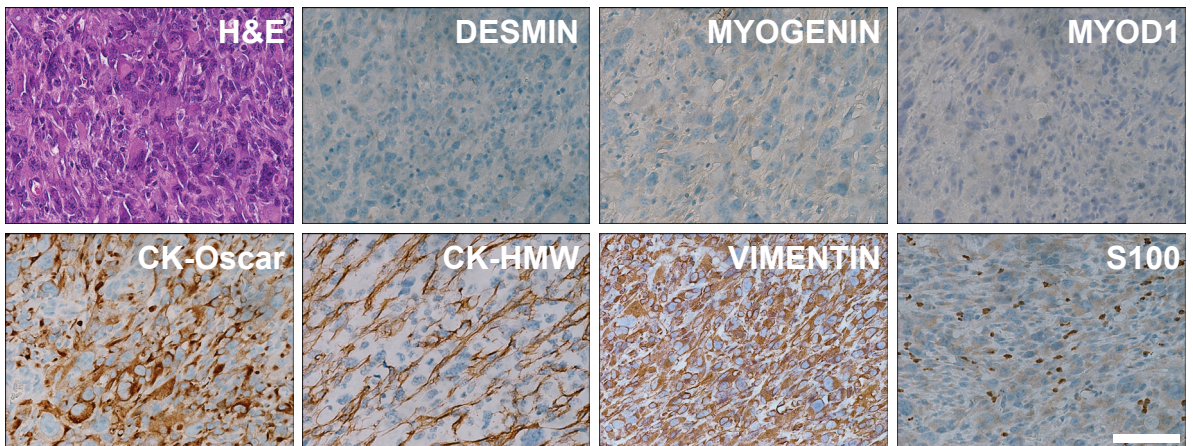

**Figure S4: Related to Figure 4. Oncogenic KRAS does not drive FN-RMS in *aP2-Cre* expressing cells**

(A) Representative H&E staining and IHC for RMS markers (DESMIN and MYOD1) and angiosarcoma markers (PECAM1, CD34, KDR, ERG, and MECA32) in *aP2-Cre;Smo<sup>M2/+</sup>;R26-tdTom* FN-RMS tumors (n = 3). Scale bars, 50  $\mu$ m.

(B) *aP2-Cre;LSL-Kras<sup>G12D</sup>;Cdkn2a<sup>Flox/Flox</sup>* malignant triton tumor showing H&E staining and IHC (DESMIN, MYOD1, MYOGENIN, S100 and CD31)(n = 1). Scale bars, 50  $\mu$ m.

(C) *aP2-Cre;LSL-Kras<sup>G12D</sup>;Cdkn2a<sup>Flox/Flox</sup>* pleomorphic spindle cell carcinoma showing H&E, and IHC (DESMIN, MYOGENIN, MYOD1, CK-OSCAR, CK-HMV, VIMENTIN and S100)(n = 1). Scale bars, 50  $\mu$ m.

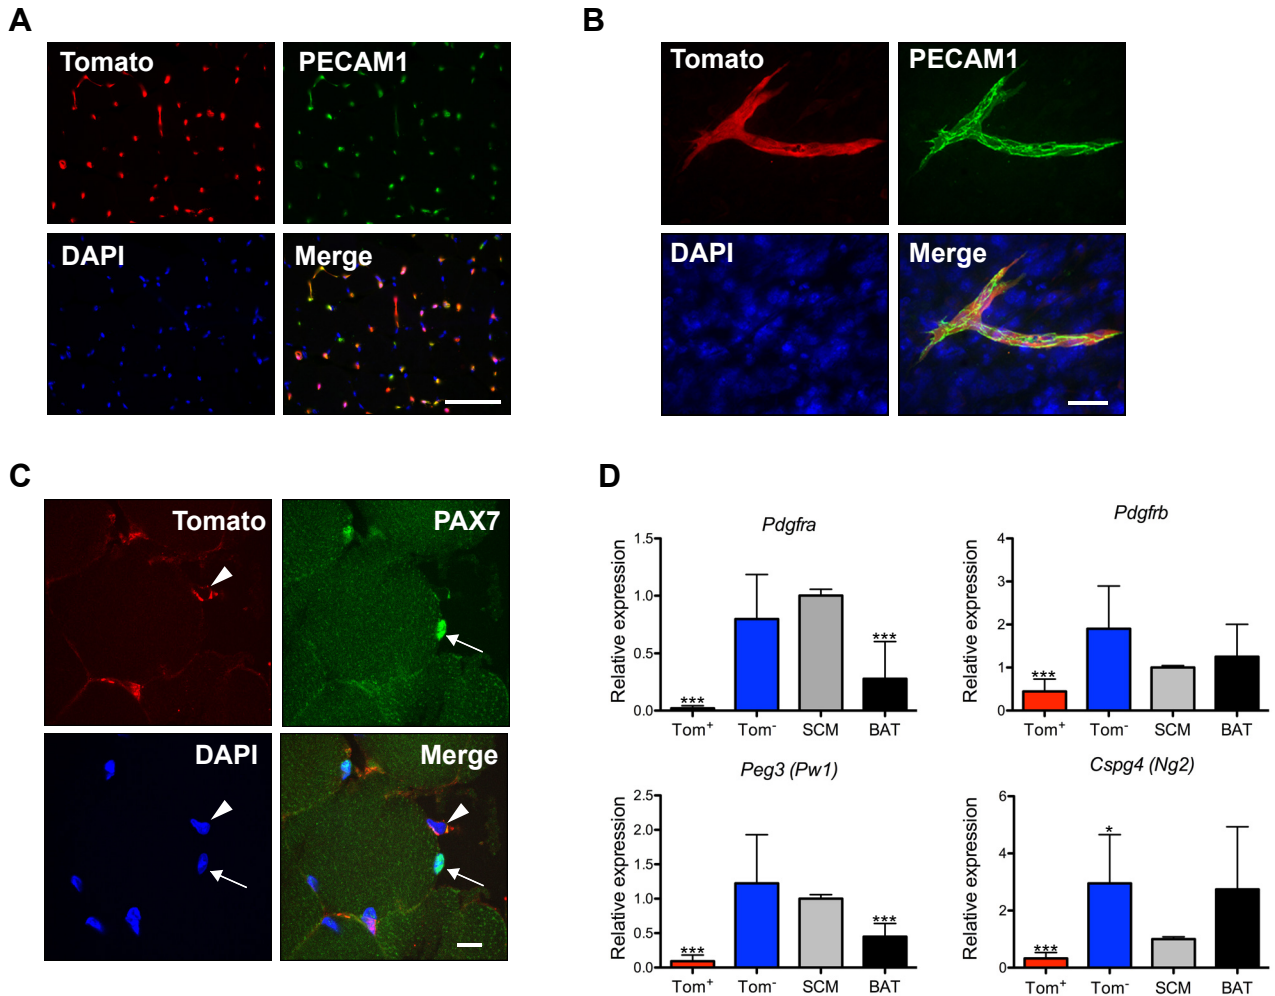

**Figure S5. Related to Figure 5. Further characterization of aP2-Cre expressing cells from aP2-Cre;Smo<sup>M2/+</sup>;R26-tdTom SCM.**

(A) Immunofluorescence of AST SCM cross sections for PECAM1 (green), TOMATO (red) and DAPI (blue). Scale bars, 50  $\mu$ m.

(B) Immunocytochemistry of aP2-Cre expressing cells. Mononuclear cells were isolated from AST SCM, grown until confluence and stained for PECAM1 (green) TOMATO (red) and DAPI (blue). Scale bars, 50  $\mu$ m.

(C) Immunofluorescence of AST SCM cross sections for PAX7 (green), TOMATO (red) and DAPI (blue). Scale bars, 10  $\mu$ m. Arrowheads denote Tom<sup>+</sup> cells and arrows denote PAX7<sup>+</sup> cells.

(D) Real-time PCR of isolated Tom<sup>+</sup> and Tom<sup>-</sup> cells from AST SCM in comparison to SmoM2 SCM and BAT. Data shown are normalized to *Actb* expression and expressed relative to mature SCM (n = 3, mean  $\pm$  SEM)

\*p < 0.05, \*\* p < 0.01, \*\*\* p < 0.001



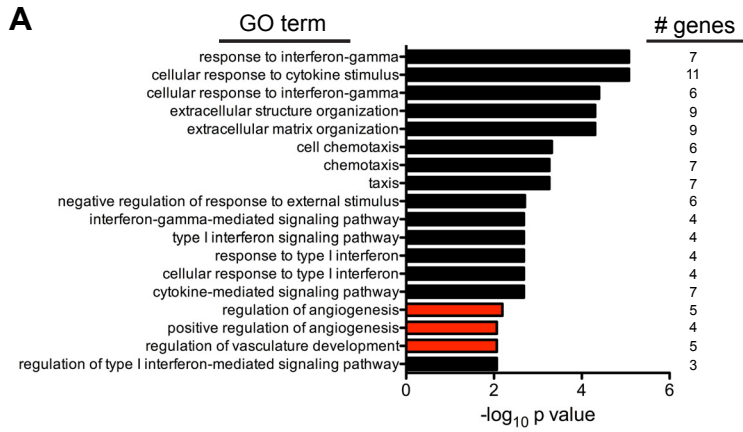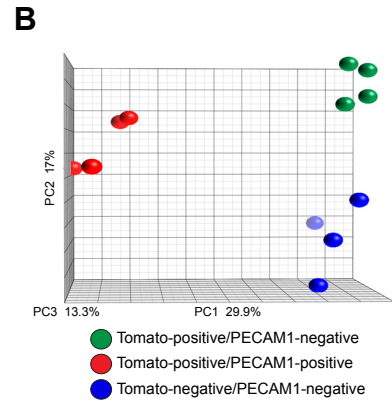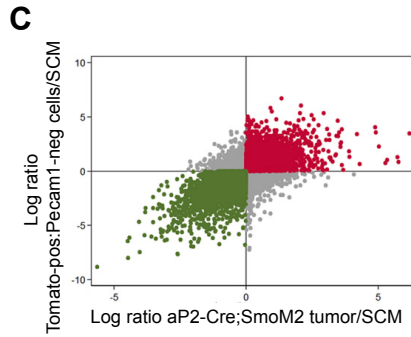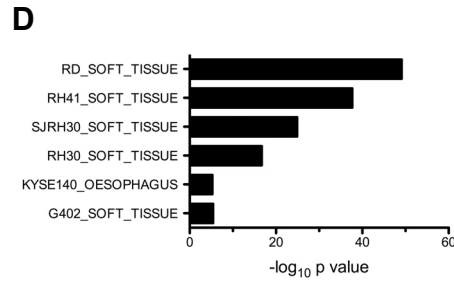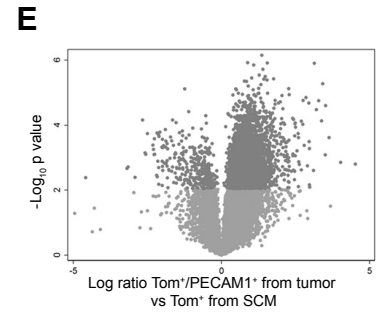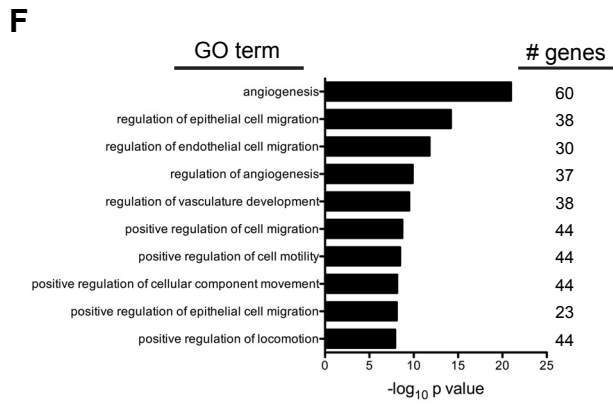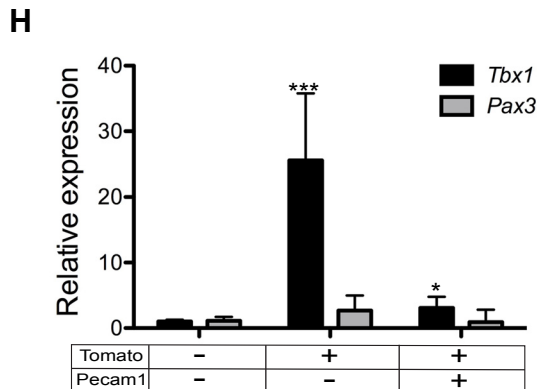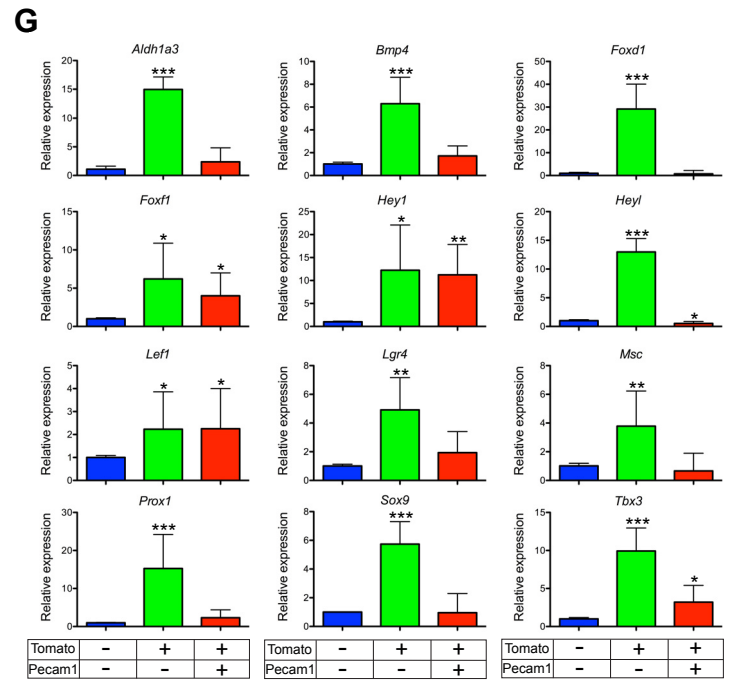

**Figure S6. Related to Figure 6. Characterization of cell populations isolated from *aP2-Cre;Smo<sup>M2/+</sup>;R26-tdTom* tumors by FACS**

(A) GO term analysis of genes upregulated in *aP2-Cre;Smo<sup>M2/+</sup>* tumors in comparison to *Myog-Cre;Smo<sup>M2/+</sup>* tumors (GSE 40359) (Hatley et al., 2012).

(B) Principal component analysis of isolated tumor cell populations from AST animals. Coordinates describe 60.2% of the data (PC1 = 29.9%, PC2 = 17% and PC3 = 17%).

(C) Comparison of isolated Tom<sup>+</sup>PECAM1<sup>-</sup> tumor cells to whole tumors from *aP2-Cre;Smo<sup>M2/+</sup>* animals. 55% of 16,957 gene pairs showed agreement in genes upregulated or downregulated in comparison to normal SCM. Pearson correlation = 0.56 (GSE 40359 and 85834).

(D) Comparison of genes enriched in isolated Tom<sup>+</sup>PECAM1<sup>-</sup> with respect to Tom<sup>-</sup>PECAM1<sup>-</sup> to genes enriched in cancer cell lines from cancer cell line encyclopedia.

(E) Volcano plot of the Log of the p value versus the log fold change in expression between the Tom<sup>+</sup> cells isolated from AT SCM and Tom<sup>+</sup>PECAM1<sup>+</sup> cells isolated from AST tumors by FACS. Solid grey dots indicate 4663 genes with FDR > 0.05. Of total 4663 genes 4518 (97%) were similarly expressed.

(F) GO term analysis of genes upregulated in Tom<sup>+</sup>PECAM1<sup>+</sup> cells with respect to Tom<sup>-</sup>PECAM1<sup>-</sup> cells.

(G) Real-time PCR of populations isolated from AST tumors by FACS. Data shown are normalized to *Actb* expression and expressed relative to Tom<sup>-</sup>PECAM1<sup>-</sup> cells (n = 3, mean ± SEM).

(H) Real-time PCR analysis of *Tbx1* and *Pax3* expression in populations isolated from AST tumors. Data shown are normalized to *Actb* expression and expressed relative to Tom<sup>-</sup>PECAM1<sup>-</sup> cells (n = 3, mean ± SEM).

\*p < 0.05, \*\* p < 0.01, \*\*\* p < 0.001

**Table S1. Related to Figure 6.** Genes upregulated in *aP2-Cre;Smo<sup>M2/+</sup>* tumors when compared to *Myogenin-Cre;Smo<sup>M2/+</sup>* tumors (GSE 40359) ( $\geq 2$  fold; p value  $< 0.05$ ).

| Gene                 | <i>aP2-Cre;Smo<sup>M2/+</sup>/<br/>Myogenin-Cre;Smo<sup>M2/+</sup></i> |          | Gene                 | <i>aP2-Cre;Smo<sup>M2/+</sup>/<br/>Myogenin-Cre;Smo<sup>M2/+</sup></i> |          |
|----------------------|------------------------------------------------------------------------|----------|----------------------|------------------------------------------------------------------------|----------|
|                      | Fold change                                                            | p value  |                      | Fold change                                                            | p value  |
| <i>Mmp10</i>         | 9.1                                                                    | 0.048    | <i>C1qb</i>          | 2.5                                                                    | 0.006    |
| <i>li</i>            | 8.6                                                                    | 0.013    | <i>H2-DMa</i>        | 2.5                                                                    | 0.007    |
| <i>li</i>            | 8.6                                                                    | 0.008    | <i>H2-Dmb1</i>       | 2.5                                                                    | 0.010    |
| <i>H2-Ab1</i>        | 6.9                                                                    | 0.010    | <i>D11Ert759e</i>    | 2.5                                                                    | 0.017    |
| <i>H2-Ab1</i>        | 6.8                                                                    | 0.020    | <i>Fbln1</i>         | 2.4                                                                    | 0.020    |
| <i>H2-Eb1</i>        | 6.6                                                                    | 0.004    | <i>Rgs5</i>          | 2.4                                                                    | 0.036    |
| <i>H2-Ab1</i>        | 5.9                                                                    | 0.009    | <i>1500015O10Rik</i> | 2.4                                                                    | 0.001    |
| <i>H2-Ab1</i>        | 5.8                                                                    | 0.005    | <i>Fcgr3</i>         | 2.4                                                                    | 0.002    |
| <i>Comp</i>          | 4.6                                                                    | 0.023    | <i>Xlr4a</i>         | 2.4                                                                    | 0.014    |
| <i>Ppfibp1</i>       | 4.4                                                                    | 1.99E-06 | <i>Cfd</i>           | 2.4                                                                    | 0.002    |
| <i>2310061N23Rik</i> | 4.1                                                                    | 0.006    | <i>C1qg</i>          | 2.3                                                                    | 0.021    |
| <i>Cxcl14</i>        | 3.9                                                                    | 0.037    | <i>lbsp</i>          | 2.3                                                                    | 0.010    |
| <i>H2Aa</i>          | 3.7                                                                    | 0.005    | <i>Psemb8</i>        | 2.3                                                                    | 1E-04    |
| <i>Spp1</i>          | 3.4                                                                    | 0.024    | <i>Laptm5</i>        | 2.2                                                                    | 0.021    |
| <i>li</i>            | 3.3                                                                    | 0.002    | <i>Aif1</i>          | 2.2                                                                    | 0.002    |
| <i>Fcrl3</i>         | 3.3                                                                    | 0.003    | <i>H2-Q2</i>         | 2.2                                                                    | 0.008    |
| <i>Dbp</i>           | 3.2                                                                    | 0.002    | <i>Ms4a6d</i>        | 2.2                                                                    | 0.015    |
| <i>Lama1</i>         | 3.2                                                                    | 0.008    | <i>Col181a</i>       | 2.2                                                                    | 0.043    |
| <i>H2-DMa</i>        | 3.2                                                                    | 0.006    | <i>Psemb9</i>        | 2.2                                                                    | 0.003    |
| <i>Gbp2</i>          | 3.1                                                                    | 0.048    | <i>Mpeg1</i>         | 2.2                                                                    | 0.006    |
| <i>Ccl8</i>          | 3.0                                                                    | 0.017    | <i>Ly86</i>          | 2.2                                                                    | 0.012    |
| <i>H2-L</i>          | 2.9                                                                    | 0.001    | <i>Parp14</i>        | 2.1                                                                    | 0.032    |
| <i>Oasl2</i>         | 2.9                                                                    | 0.003    | <i>Hsp105</i>        | 2.1                                                                    | 0.014    |
| <i>Wnt5a</i>         | 2.9                                                                    | 0.042    | <i>LOC381292</i>     | 2.1                                                                    | 0.004    |
| <i>H2-Dmb2</i>       | 2.9                                                                    | 0.002    | <i>Ctsh</i>          | 2.1                                                                    | 0.023    |
| <i>B2m</i>           | 2.8                                                                    | 0.003    | <i>Scd1</i>          | 2.1                                                                    | 9.36E-05 |
| <i>Gbp4</i>          | 2.8                                                                    | 0.026    | <i>Wisp2</i>         | 2.1                                                                    | 0.023    |
| <i>Col8a1</i>        | 2.8                                                                    | 0.038    | <i>Tmepai</i>        | 2.1                                                                    | 0.021    |
| <i>C1qtnf3</i>       | 2.8                                                                    | 0.049    | <i>Wnt5a</i>         | 2.1                                                                    | 0.011    |
| <i>Gvin1</i>         | 2.7                                                                    | 0.037    | <i>Cx3cr1</i>        | 2.1                                                                    | 0.016    |
| <i>Usp18</i>         | 2.7                                                                    | 0.005    | <i>Cxcl16</i>        | 2.1                                                                    | 0.02     |
| <i>H2-D1</i>         | 2.7                                                                    | 0.006    | <i>ApoE</i>          | 2.1                                                                    | 0.025    |
| <i>Cd52</i>          | 2.7                                                                    | 0.032    | <i>Bcl2a1d</i>       | 2.1                                                                    | 0.048    |
| <i>Cd72</i>          | 2.6                                                                    | 0.002    | <i>Ptgis</i>         | 2.1                                                                    | 0.017    |
| <i>Vcam1</i>         | 2.6                                                                    | 0.035    | <i>Stat1</i>         | 2.1                                                                    | 0.008    |
| <i>Slamf9</i>        | 2.6                                                                    | 0.014    | <i>Sla</i>           | 2.0                                                                    | 0.018    |
| <i>B2M</i>           | 2.6                                                                    | 0.013    | <i>Chad</i>          | 2.0                                                                    | 0.04     |
| <i>LOC56628</i>      | 2.6                                                                    | 0.005    | <i>Oas1g</i>         | 2.0                                                                    | 0.001    |
| <i>H2-L</i>          | 2.6                                                                    | 0.003    | <i>Col81a</i>        | 2.0                                                                    | 0.033    |
| <i>Ms4a7</i>         | 2.5                                                                    | 0.005    |                      |                                                                        |          |

**Table S2. Related to Figure 6.** Gene ontology functional analysis of 382 genes upregulated in sorted Tom<sup>+</sup>PECAM1<sup>+</sup> cells with respect to Tom<sup>-</sup>PECAM1<sup>-</sup> cells isolated from AST tumors ( $\geq 2$  fold; p value < 0.05).

| GO Biological Process                     | Genes                                                                                                                                                                                                                                             | Overlap | Adjusted p value |
|-------------------------------------------|---------------------------------------------------------------------------------------------------------------------------------------------------------------------------------------------------------------------------------------------------|---------|------------------|
| Actin-myosin filament sliding             | <i>Mybpc1; Actn3; Actn2; Tnnc1; Tnnc2; Neb; Myl6b; Ttn; Acta1; Actc1; Des; Myh3; Myl1; Tnnt1; Tnnt2; Tnnt3; Myh8; Tnni1</i>                                                                                                                       | 18/38   | 9.29E-16         |
| Muscle filament sliding                   | <i>Mybpc1; Actn3; Actn2; Tnnc1; Tnnc2; Neb; Myl6b; Ttn; Acta1; Actc1; Des; Myh3; Myl1; Tnnt1; Tnnt2; Tnnt3; Myh8; Tnni1</i>                                                                                                                       | 18/38   | 9.29E-16         |
| Muscle contraction                        | <i>Ryr1; Chrna1; Smpx; Tshz3; Myl6b; Ttn; Csrp3; Sgca; Mb; Cacng1; Chrnb1; Mybpc1; Dtna; Actn2; Tnnc1; Tnnc2; Pgam2; Khlh41; Trdn; Acta1; Myh1; Des; Actc1; Myh3; Myl1; Tnnt1; Myot; Tnnt3; Myh8; Sntb1</i>                                       | 30/195  | 9.29E-16         |
| Muscle system process                     | <i>Ryr1; Chrna1; Tshz3; Smpx; Atp2a1; Myl6b; Ttn; Csrp3; Sgca; Mb; Cacng1; Myog; Chrnb1; Mybpc1; Dtna; Actn2; Tnnc1; Tnnc2; Pgam2; Khlh41; Trdn; Acta1; Myh1; Actc1; Des; Myh3; Myl1; Tnnt1; Myot; Tnnt3; Myh8; Sntb1</i>                         | 32/237  | 1.46E-15         |
| Actin-mediated cell contraction           | <i>Mybpc1; Actn3; Actn2; Tnnc1; Tnnc2; Neb; Myl6b; Ttn; Acta1; Actc1; Myh3; Des; Myl1; Tnnt1; Tnnt2; Tnnt3; Myh8; Tnni1</i>                                                                                                                       | 18/46   | 5.76E-15         |
| Tissue morphogenesis                      | <b><i>Lama5; Hhip; Lef1; Tcf21; Ttn; Sall1; Hey1; Sox18; Tnni1; Gpc3; Sostdc1; Sox9; Pitx2; Tbx1; Foxd1; Foxf1; Tnnc1; Ptch1; Wnt5a; Prox1; Bmp7; Pgf; Tbx3; Bmp4; Aldh1a3; Heyl; Actc1; Pax7; Tnnt2; Myf6; Met; Lgr4; Fgfr2; Frem2; Myf5</i></b> | 35/358  | 2.27E-13         |
| Actin filament-based movement             | <i>Mybpc1; Actn3; Actn2; Tnnc1; Tnnc2; Neb; Myl6b; Ttn; Acta1; Actc1; Myh3; Des; Myl1; Tnnt1; Tnnt2; Tnnt3; Myh8; Tnni1</i>                                                                                                                       | 18/61   | 2.51E-13         |
| Regulation of muscle cell differentiation | <i>Tbx1; Myog; Cav3; Megf10; Tshz3; Mamstr; Foxf1; Prox1; Tbx3; Khlh41; Bmp4; Myod1; Myf6; Smyd1; Sox9; Cdh15; Rbm24; Fgfr2; Cdon; Myf5</i>                                                                                                       | 20/122  | 8.82E-11         |
| Striated muscle contraction               | <i>Chrna1; Dtna; Smpx; Tnnc1; Pgam2; Tnnc2; Khlh41; Ttn; Csrp3; Myh3; Actc1; Myl1; Tnnt1; Mb; Tnnt3; Myh8</i>                                                                                                                                     | 16/71   | 2.90E-10         |
| Tube development                          | <i>Robo2; Tgfb2; Foxf2; Tshz3; Foxf1; Wnt5a; Tcf21; Cobl; Prox1; Gata2; Bmp7; Bmp4; Heyl; Calb1; Sall1; Sox18; Plxna2; Sox9; Fgfr2; Stra6</i>                                                                                                     | 20/164  | 9.35E-09         |



**Table S3. Related to Figure 7.** Genes upregulated in both Tom<sup>+</sup>PECAM1<sup>+</sup> and Tom<sup>+</sup>PECAM1<sup>-</sup> cells with respect to Tom<sup>-</sup>PECAM1<sup>-</sup> cells isolated from AST tumors by FACS. Data shown as fold change from expression arrays.

| Gene                 | Tom <sup>-</sup> ;PECAM1 <sup>-</sup><br>/Tom <sup>+</sup> ; PECAM1 <sup>-</sup> |         | Tom <sup>-</sup> ; PECAM1 <sup>-</sup><br>/Tom <sup>+</sup> ; PECAM1 <sup>+</sup> |          | Tom <sup>+</sup> ; PECAM1 <sup>-</sup><br>/Tom <sup>+</sup> ; PECAM1 <sup>+</sup> |         |
|----------------------|----------------------------------------------------------------------------------|---------|-----------------------------------------------------------------------------------|----------|-----------------------------------------------------------------------------------|---------|
|                      | Fold change                                                                      | p value | Fold change                                                                       | p value  | Fold change                                                                       | p value |
| <i>9530026P05Rik</i> | 2.0                                                                              | 0.005   | 2.1                                                                               | 0.004    | -1.1                                                                              | 0.741   |
| <i>9630013A20Rik</i> | 2.1                                                                              | 0.023   | 4.0                                                                               | 0.001    | -1.9                                                                              | 0.013   |
| <i>Ablim3</i>        | 2.3                                                                              | 0.020   | 16                                                                                | 1.1E-04  | -7.0                                                                              | 8.2E-04 |
| <i>Adamts9</i>       | 2.0                                                                              | 0.003   | 4.7                                                                               | 3.6E-05  | -2.3                                                                              | 7.0E-05 |
| <i>Cdh13</i>         | 2.3                                                                              | 0.001   | 4.8                                                                               | 2.1E-05  | -2.1                                                                              | 0.001   |
| <i>Cdh5</i>          | 2.1                                                                              | 0.005   | 36                                                                                | 1.8E-05  | -17                                                                               | 3.8E-05 |
| <i>Chp2</i>          | 2.4                                                                              | 0.008   | 5.1                                                                               | 2.3E-04  | -2.1                                                                              | 0.015   |
| <i>D930048N14Rik</i> | 2.1                                                                              | 0.002   | 2.6                                                                               | 4.4E-04  | -1.2                                                                              | 0.186   |
| <i>Dach1</i>         | 2.1                                                                              | 0.018   | 11                                                                                | 1.3E-04  | -5.4                                                                              | 1.6E-05 |
| <i>Dock6</i>         | 2.0                                                                              | 0.007   | 3.8                                                                               | 1.8E-04  | -1.9                                                                              | 0.003   |
| <i>Enpp3</i>         | 2.5                                                                              | 0.008   | 8.8                                                                               | 1.5E-04  | -3.6                                                                              | 8E-04   |
| <i>Enpp6</i>         | 4.4                                                                              | 0.002   | 4.7                                                                               | 0.003    | -1.1                                                                              | 0.720   |
| <i>Gata2</i>         | 2.0                                                                              | 0.006   | 4.7                                                                               | 5E-04    | -2.3                                                                              | 0.010   |
| <i>Gt(ROSA)26Sor</i> | 2.4                                                                              | 1.1E-04 | 3.3                                                                               | 4.3E-05  | -1.4                                                                              | 0.004   |
| <i>Itga3</i>         | 2.0                                                                              | 0.003   | 4.4                                                                               | 5.1E-05  | -2.2                                                                              | 0.002   |
| <i>Lama5</i>         | 2.1                                                                              | 0.002   | 3.4                                                                               | 1.4E-04  | -1.7                                                                              | 0.010   |
| <i>Lepr</i>          | 3.7                                                                              | 1.5E-04 | 3.2                                                                               | 3.6 E-04 | 1.2                                                                               | 0.348   |
| <i>Lmo7</i>          | 2.6                                                                              | 0.002   | 4.3                                                                               | 3.7E-04  | -1.7                                                                              | 0.010   |
| <i>Mamstr</i>        | 2.4                                                                              | 0.002   | 4.1                                                                               | 7.2E-04  | -1.7                                                                              | 0.042   |
| <i>Mpzl1</i>         | 2.1                                                                              | 0.004   | 2.0                                                                               | 0.004    | 1.0                                                                               | 0.870   |
| <i>Nqo1</i>          | 2.5                                                                              | 0.002   | 2.6                                                                               | 0.005    | -1.0                                                                              | 0.860   |
| <i>Pcdh17</i>        | 2.9                                                                              | 0.017   | 4.8                                                                               | 0.004    | -1.6                                                                              | 0.060   |
| <i>Plxna2</i>        | 2.3                                                                              | 0.011   | 3.6                                                                               | 0.001    | -1.6                                                                              | 0.050   |
| <i>Ptprk</i>         | 2.3                                                                              | 0.015   | 4.3                                                                               | 8.1E-04  | -1.9                                                                              | 0.014   |
| <i>Samd5</i>         | 2.1                                                                              | 7.7E-04 | 5.4                                                                               | 1.5E-06  | -2.6                                                                              | 1.9E-04 |
| <i>Sncaip</i>        | 2.1                                                                              | 4.8E-04 | 7.9                                                                               | 1.5E-05  | -3.8                                                                              | 4.7E-05 |
| <i>Sox18</i>         | 3.1                                                                              | 8.7E-05 | 19                                                                                | 7.7E-06  | -6.1                                                                              | 6.8E-05 |
| <i>Tanc1</i>         | 2.1                                                                              | 8.1E-04 | 2.5                                                                               | 0.003    | -1.2                                                                              | 0.393   |
| <i>Thsd7a</i>        | 2.0                                                                              | 0.007   | 3.1                                                                               | 6.8E-04  | -1.5                                                                              | 0.009   |
| <i>Tspan12</i>       | 2.1                                                                              | 0.007   | 3.7                                                                               | 3.8E-04  | -1.8                                                                              | 0.004   |
| <i>Tspan7</i>        | 2.2                                                                              | 0.017   | 11                                                                                | 1.2E-04  | -5.1                                                                              | 5.1E-05 |
| <i>Wipf3</i>         | 2.5                                                                              | 0.034   | 2.3                                                                               | 0.032    | 1.1                                                                               | 0.736   |

**Table S4. Related to STAR Methods. Antibodies used for Immunostaining.**

| Antigen      | Sections              | Catalog/<br>Vendor       | Concentration | Antigen<br>Retrieval                  | Secondary                                                       | Detection            |
|--------------|-----------------------|--------------------------|---------------|---------------------------------------|-----------------------------------------------------------------|----------------------|
| CD34         | FFPE                  | 553731<br>BD bioscience  | 1:50          | CC1<br>950-500 Roche                  | Omap Rat,<br>760-4457, Roche                                    | DAB                  |
| Desmin       | FFPE                  | RB-9014,<br>ThermoFisher | 1:500         | CC1<br>950-500 Roche                  | OmniMap Rabbit,<br>760-4311, Roche                              | DAB                  |
| ERG          | FFPE                  | ab133264,<br>Abcam       | 1:1700        | ER2<br>AR9640 Leica                   | Bond Polymer<br>DS9800, Leica                                   | DAB                  |
| CK-<br>Oscar | FFPE                  | 465-01<br>Covance        | 1:250         | CC1, 950-500<br>Roche                 | Rabbit Anti-Mouse<br>OmniMap Rabbit,<br>760-4311, Roche         | DAB                  |
| CK-HMV       | FFPE                  | M063029<br>DAKO          | 1:750         | Proteinase K<br>S302030 DAKO          | Rabbit Anti-Mouse<br>OmniMap Rabbit,<br>760-4311, Roche         | DAB                  |
| KDR          | FFPE -IF              | AF644,<br>R&D systems    | 1:50          | pH6 Citrate<br>Buffer<br>C9999, Sigma | Anti-Goat HRP<br>A16005, ThermoFisher                           | TSA –<br>Fluorescein |
|              | FFPE-IHC              | AF644,<br>R&D systems    | 1:20          | Target Retrieval<br>pH6<br>S1699 DAKO | Anti-Goat HRP<br>SC-2042,<br>Santa Cruz                         | Strep-HRP,<br>DAB    |
| Laminin      | Frozen                | L9393,<br>Sigma          | 1:500         | N/A                                   | Anti-Rabbit Cy5<br>A10523, ThermoFisher                         | N/A                  |
| Meca32       | FFPE                  | 553849,<br>BD Bioscience | 1:50          | Target Retrieval<br>pH6<br>S1699 DAKO | Rat Polymer<br>RT517L, Biocare<br>Medical                       | DAB                  |
| MHC          | Frozen                | MF20,<br>DSHB            | 1:25          | N/A                                   | Anti-Mouse<br>AlexaFluor488<br>A11029, ThermoFisher             | N/A                  |
|              | FFPE                  | MF20,<br>DSHB            | 1:25          | pH6 Citrate<br>Buffer<br>C9999, Sigma | Anti-Mouse<br>AlexaFluor488<br>A11029, ThermoFisher             | N/A                  |
| MyoD1        | FFPE-IF               | M3512,<br>DAKO           | 1:50          | Target Retrieval<br>pH9<br>S2367 DAKO | Goat Anti Mouse<br>IgG1HRP<br>S2969 SantaCruz                   | TSA –<br>Fluorescein |
|              | FFPE-IHC              | 386R-18,<br>Cell Marque  | undiluted     | ER2<br>AR9640, Leica                  | Bond Polymer<br>DS9800, Leica                                   | DAB                  |
| Myogenin     | FFPE-IHC              | M3559,<br>DAKO           | 1:200         | Target Retrieval<br>pH9<br>S2367 DAKO | Mouse on Mouse<br>polymer HRP<br>MM510L, Biocare<br>Medical     | DAB                  |
| Pax7         | Frozen                | DSHB                     | 1:10          | pH6 Citrate<br>Buffer<br>C9999, Sigma | Anti mouseIgG1<br>AlexaFluor488<br>A21121, ThermoFisher         | N/A                  |
| Pecam1       | Cultures/<br>Frozen   | 550274<br>BD bioscience  | 1:50          | N/A                                   | Anti Rat AlexaFluor488<br>A11006, ThermoFisher                  | N/A                  |
|              | FFPE - IF             | Dianova<br>Dia 310       | 1:20          | pH6 Citrate<br>Buffer<br>C9999, Sigma | Anti rat HRP<br>AP136P, Millipore                               | TSA –<br>Fluorescein |
|              | FFPE-IHC              | Dianova<br>Dia 310       | 1:100         | CC1<br>950-500 Roche                  | OmniMap Rat<br>760-4457 Roche                                   | DAB                  |
| S100         | FFPE-IHC              | Z031129<br>Dako          | 1:2,000       | CC1<br>950-500 Roche                  | OmniMap Rabbit,<br>760-4311, Roche                              | DAB                  |
| Tomato       | Frozen<br>(Pax7 only) | 600-401-379<br>Rockland  | 1:100         |                                       | Anti Rabbit<br>AlexaFluor568,<br>A11056, A10042<br>ThermoFisher | N/A                  |
|              | FFPE-IHC              | 600-401-379<br>Rockland  | 1:100         |                                       | Anti Rabbit<br>AlexaFluor568,<br>A11056, ThermoFisher           | N/A                  |
|              | RNAscope/<br>IHC      | LS-C340696<br>LS Bio     | 1:20,000      | CC1,950-500<br>Roche                  | OmniMap Rabbit,<br>760-4311, Roche                              | DAB                  |
| Vimentin     | FFPE-IHC              | NBP1-40730,<br>Novus     | 1:1000        | ER1,<br>AR9961 Leica                  | Bond Polymer<br>DS9800, Leica                                   | DAB                  |

**Table S5. Related to STAR Methods.** Antibodies used for Flow Cytometry.

|                          | <b>Clone</b> | <b>Catalog #<br/>/Company</b> | <b>Concentration</b> |
|--------------------------|--------------|-------------------------------|----------------------|
| $\beta$ -1 integrin-FITC | Ha2/5        | 561796<br>BD Biosciences      | 1:50                 |
| CD11b-APC                | M1/70        | 553312<br>BD Biosciences      | 1:50                 |
| CD45-APC                 | 30-F11       | 561018<br>BD Biosciences      | 1:50                 |
| CXCR4-Biotin             | 2B11/CXCR4   | 551968<br>BD Biosciences      | 1:50                 |
| Streptavidin PE-Cy7      |              | 25-431782<br>eBioscience      | 1:50                 |
| Pecam1-APC               | Mec13.3      | 551262<br>BD Biosciences      | 1:50                 |
| Pecam1-FITC              | Mec13.3      | 561813<br>BD Biosciences      | 1:50                 |
| Sca1-PerCP-Cy5.5         | D7           | 25-5981-82<br>eBioscience     | 1:50                 |
| Ter119-APC               |              | 557909<br>BD Biosciences      | 1:50                 |

**Table S6. Related to STAR Methods.** SYBR primers used for quantitative real-time PCR.

|                  | <b>Right Primer</b>   | <b>Left Primer</b>    |
|------------------|-----------------------|-----------------------|
| <i>Actb</i>      | ATGGAGGGGAATACAGCCC   | TTCTTTGCAGCTCCTTCGTT  |
| <i>Aldh1A3</i>   | GACGAAAAGGCATGAAGGA   | TCAGCTGGCTGACCTTGTAG  |
| <i>aP2</i>       | CACTTTCCTTGTGGCAAAGC  | AATGTGTGATGCCTTTGTGG  |
| <i>Bmp4</i>      | AGCCCGCTTCTGCAGGA     | AAAGGCTCAGAGAAGCTGCG  |
| <i>Cdh5</i>      | CGTTGGACTTGATCTTTCCC  | CGCCAAAAGAGAGACTGGAT  |
| <i>Cspg4</i>     | ACTCTGGTCAGAGCTGAGGG  | TCTTACCTTGGCCTTGTGG   |
| <i>Foxd1</i>     | GTCTGGTCCAAGAATCCGAA  | GGGAGAGCGAAGGTAGGACT  |
| <i>Foxf1</i>     | TGGGCGACTGTGAGTGATAC  | ACTCCCTGGAGCAGCCATAC  |
| <i>Gata2</i>     | GCCATAAGGTGGTGGTTGTC  | CACTACCTGTGCAATGCCTG  |
| <i>Gli1</i>      | ATTGGATTGAACATGGCGTC  | GGATGAAGAAGCAGTTGGGA  |
| <i>Hey1</i>      | TCCGATAGTCCATAGCCAGG  | TTGCAGATGACTGTGGATCA  |
| <i>Heyl</i>      | TCTCTGCGCCGTTTCTCTAT  | CCATCGATGTGGGTCAAGAG  |
| <i>Kdr</i>       | TCCAGAATCCTCTTCCATGC  | CCAGAGACCCTCGTTTTTCAG |
| <i>Lef1</i>      | AAATGGGTCCCTTTCTCCAC  | TCGTCGCTGTAGGTGATGAG  |
| <i>Myf5</i>      | GACAGGGCTGTTACATTCAGG | TGAGGGAACAGGTGGAGAAC  |
| <i>Myod1</i>     | GTCTAGCCATTCTGCCG     | AGCACTACAGTGGCGACTCA  |
| <i>Pax7</i>      | GTCCGGTTCTGATTCCACAT  | GCGAGAAGAAAGCCAAACAC  |
| <i>Pdgfra</i>    | AGAAAATCCGATACCCGGAG  | AGAGGAGGAGCTTGAGGGAG  |
| <i>Pdgfrb</i>    | TGGTATCACTCCTGGAAGCC  | AACAGAAGACAGCGAGGTGG  |
| <i>Pecam1</i>    | AGTTGCTGCCATTCATCAC   | CTGGTGCTCTATGCAAGCCT  |
| <i>Peg3</i>      | TCAACTGATCTCCCCTTGCT  | TTTGGAGACAACTGGCAAGA  |
| <i>Pparg</i>     | TCTTCCATCACGGAGAGGTC  | GATGCACTGCCTATGAGCAC  |
| <i>Prox1</i>     | GGCATTGAAAACTCCCGTA   | TTGTGAGCTATACCGAGCCC  |
| <i>Ptch1</i>     | AATTCTCGACTCACTCGTCCA | CTCCTCATATTTGGGGCCTT  |
| <i>Sox9</i>      | TCCACGAAGGGTCTCTTCTC  | AGGAAGCTGGCAGACCAGTA  |
| <i>Sox18</i>     | AAGTGCTGCACACGCAAC    | CACAACGCAGTACTGAGCAAG |
| <i>SmoM2-YFP</i> | GGGATCCATTCAATCCCGCA  | AAACGGCCACAAGTTCAGC   |
| <i>Tbx3</i>      | CATTGCCAGTGTCTCGAAAA  | TCCCGGAAACAGAATTCATC  |
| <i>Tcf7l2</i>    | GGGATCATGATGAAGGGGTA  | TAAATCCCGGGAAAGTTTGG  |
| <i>Tcf21</i>     | GGCTGGCGTCCAGCTACATCG | TGCCGGCCACCATAAAGGGC  |
| <i>Tomato</i>    | AGTTCATGTACGGCTCCAAGG | AGCGCGTGATGAACTTCGA   |
| <i>Tomato2</i>   | GGCATTAAAGCAGCGTATCC  | CTGTTCTGTACGGCATGG    |
| <i>Tek</i>       | TTTCGGCATCAGACACAAGA  | CCGGCTTAGTTCTCTGTGGA  |
| <i>Vwf</i>       | CCGTCTTCAGTAGCTGGCAT  | GTGTAAACGGGCATCTCCTC  |
| <i>Ucp1</i>      | AGAAGCCACAAACCCTTTGA  | TCTCTGCCAGGACAGTACC   |
